# Supplementary material for: Undernutrition and Obesity Are Associated with Adverse Clinical Outcomes in Hospitalized Children and Adolescents with Acute Pancreatitis
Source: PubMed Central journal article supplement (PMC7824217; doi:10.3390/nu13010043), 2020-12-25
Supplement: nutrients-13-00043-s001.pdf [file nutrients-13-00043-s001.pdf]

**Table S1.** List of diagnostic and procedural codes utilized using the International Classification of Disease (ICD)-9-CM for Kids' Inpatient Database 2003, 2006, 2009, and 2012 and ICD-10-CM for Kids' Inpatient Database 2016.

**ICD codes:**

| <b>Diagnosis</b>                                   | <b>ICD 9</b>                                                                                                   | <b>ICD 10</b>                                                                                                                                                                                                                                                                                                                                                                                                                                                                                                                                              |
|----------------------------------------------------|----------------------------------------------------------------------------------------------------------------|------------------------------------------------------------------------------------------------------------------------------------------------------------------------------------------------------------------------------------------------------------------------------------------------------------------------------------------------------------------------------------------------------------------------------------------------------------------------------------------------------------------------------------------------------------|
| Acute pancreatitis                                 | 577.0                                                                                                          | K85*                                                                                                                                                                                                                                                                                                                                                                                                                                                                                                                                                       |
| Chronic pancreatitis                               | 577.1                                                                                                          | K86*                                                                                                                                                                                                                                                                                                                                                                                                                                                                                                                                                       |
| Pseudocyst of pancreas                             | 5772                                                                                                           | K86.3                                                                                                                                                                                                                                                                                                                                                                                                                                                                                                                                                      |
| Cholelithiasis/choledocholithiasis                 | 574*                                                                                                           | K80.*                                                                                                                                                                                                                                                                                                                                                                                                                                                                                                                                                      |
| Cholangitis                                        | 576.1                                                                                                          | K83.*                                                                                                                                                                                                                                                                                                                                                                                                                                                                                                                                                      |
| Other biliary disease                              | 576.2, 576.8, 782.4, 576.9                                                                                     | K83.1, K83.8, K83.9, R17                                                                                                                                                                                                                                                                                                                                                                                                                                                                                                                                   |
| IBD                                                | 555*, 556*                                                                                                     | K50*, K51*                                                                                                                                                                                                                                                                                                                                                                                                                                                                                                                                                 |
| Cystic Fibrosis                                    | 277.0*                                                                                                         | E84*                                                                                                                                                                                                                                                                                                                                                                                                                                                                                                                                                       |
| Hypertriglyceridemia                               | 272.1                                                                                                          | E78.1                                                                                                                                                                                                                                                                                                                                                                                                                                                                                                                                                      |
| Hypercalcemia                                      | 275.42                                                                                                         | E83.52                                                                                                                                                                                                                                                                                                                                                                                                                                                                                                                                                     |
| Abdominal trauma                                   | 863*, 864*, 865*, 866*, 867*, 868*, 869*                                                                       | S36 * to S39*                                                                                                                                                                                                                                                                                                                                                                                                                                                                                                                                              |
| Anomalies of pancreas                              | 751.7                                                                                                          | Q45.0 to Q45.3                                                                                                                                                                                                                                                                                                                                                                                                                                                                                                                                             |
| DKA                                                | 250.1*                                                                                                         | E081, E0811, E091, E0911, E101, E1011, E111, E1111                                                                                                                                                                                                                                                                                                                                                                                                                                                                                                         |
| SLE                                                | 695.4, 710.0                                                                                                   | M32*, L93*                                                                                                                                                                                                                                                                                                                                                                                                                                                                                                                                                 |
| Solid organ transplant                             | 996.8*, V42 to V42.7, V42.84, , V 42.83, Z94.83, V42.9                                                         | T86.1*, T86.2*, T86.3*, T86.4*                                                                                                                                                                                                                                                                                                                                                                                                                                                                                                                             |
| Alcohol related                                    | 291*, 303*, 305*, 760.71, 980.0, 357.5, 425.5, 535.30, 535.31, 571*                                            | G62.1, G31.2, T510X1A, T510X2A, T510X3A, T510X4A, F10*, Y90*, K70*, Z714*, K29.0, K29.1, K29.2.                                                                                                                                                                                                                                                                                                                                                                                                                                                            |
| Pulmonary embolism                                 | 415.1*                                                                                                         | I26*                                                                                                                                                                                                                                                                                                                                                                                                                                                                                                                                                       |
| Deep Vein thrombosis                               | 453.4*, 453.82, 453.82                                                                                         | I824*, I826*                                                                                                                                                                                                                                                                                                                                                                                                                                                                                                                                               |
| Use of Vasopressor <sup>#</sup>                    | 0017                                                                                                           | 3E030XZ, 3E033XZ, 3E040XZ, 3E043XZ, 3E050XZ, 3E053XZ, 3E060XZ, 3E063XZ                                                                                                                                                                                                                                                                                                                                                                                                                                                                                     |
| Intubation and mechanical ventilation <sup>#</sup> | 93.90, 96.0*, 96.7*                                                                                            | 5A09357, 5A09457, 5A09557, 09HN7BZ, 0CHY7BZ, 0DH57BZ, 0NH17EZ, 5A1935Z, 5A1945Z, 5A1955Z, 0BH07DZ                                                                                                                                                                                                                                                                                                                                                                                                                                                          |
| Central venous catheter <sup>#</sup>               | 38.93, 86.07                                                                                                   | 0JH63XZ, 0JHD3XZ, 0JHF3WZ, 0JHM3XZ, 0JHL3XZ                                                                                                                                                                                                                                                                                                                                                                                                                                                                                                                |
| Common Bile duct exploration <sup>#</sup>          | 51.02, 51.03, 51.04, 41.32, 51.36, 51.37, 51.39, 51.41, 51.43, 51.51, 51.59, 51.63, 51.64, 51.69, 51.71, 51.79 | 0FT90ZZ, 0FT50ZZ, 0FT60ZZ, 0FT70ZZ, 0FT80ZZ, 0F550ZZ, 0F560ZZ, 0F570ZZ, 0F580ZZ, 0FB50ZZ, 0FB60ZZ, 0FB70ZZ, 0FB80ZZ, 0FC90ZZ, 0F9900Z, 0F9900Z, 0F990ZZ, 0F9940Z, 0F9400Z, 0FC400Z, 0FQ97ZZ, 0FQ90ZZ, 0F150D3, 0F150DB, 0F150Z3, 0F150ZB, 0F160D3, 0F160DB, 0F160Z3, 0F160ZB, 0F170D3, 0F170DB, 0F170Z3, 0F170ZB, 0F180D3, 0F180DB, 0F180Z3, 0F180ZB, 0F190D3, 0F190DB, 0F190Z3, 0F190ZB, 0F140D3, 0F140DB, 0F140Z3, 0F140ZB,                                                                                                                              |
| Cholecystectomy <sup>#</sup>                       | 51.2*                                                                                                          | 0FB40ZX, 0FB40ZZ, 0FB43ZX, 0FB43ZZ, 0FB48ZX, 0FB48ZZ, 0FB44ZX, 0FB44ZZ,                                                                                                                                                                                                                                                                                                                                                                                                                                                                                    |
| Pancreatectomy <sup>#</sup>                        | 52.22, 52.95, 52.96 52.99                                                                                      | 0F7D0ZZ, 0FQD0ZZ, 0FQG0ZZ, 0F1D0D3, 0F1D0DB, 0F1D0Z3, 0F1D0ZB, 0F1G0D3, 0F1G0ZB, 0F1G0ZZ, 0FTG0ZZ, 0F1G0ZC, 0FTG0ZZ, 0FBG0ZZ, 0F9G00Z, 0FCD0ZZ, 0FCD8ZZ, 0F9D0ZX, 0F9D8ZZ                                                                                                                                                                                                                                                                                                                                                                                  |
| ERCP <sup>#</sup>                                  | 51.83, 51.84, 51.85, 51.86, 51.87, 51.88, 51.10, 51.11, 51.14, 52.13, 52.93, 52.94, 52.98, 97.05.              | 0FQC7ZZ, 0FQC8ZZ, 0F758ZZ, 0F768ZZ, 0F778ZZ, 0F7C8DZ, 0F7C8ZZ, 0F958ZZ, 0F968ZZ, 0F978ZZ, 0F988ZZ, 0F998ZZ, 0F9C8ZZ, 0F9D8ZZ, 0F9C80Z, 0F9980Z, 0F758DZ, 0F768DZ, 0F778DZ, 0F788DZ, 0F798DZ, 0FHB4DZ, 0FHB8DZ, 0FC58ZZ, 0FC68ZZ, 0FC78ZZ, 0FC98ZZ, 0FC88ZZ, 0FCC8ZZ, 0FF48ZZ, 0FF58ZZ, 0FF68ZZ, 0FF78ZZ, 0FF88ZZ, 0FF98ZZ, 0FFC8ZZ, 0F959ZX, 0F968ZX, 0F978ZX, 0F988ZX, 0F998ZX, 0F9C8ZX, 0FB48ZX, 0FB58ZX, 0FB68ZX, 0FB78ZX, 0FB88ZX, 0FB98ZX, 0FBC8ZX, 0FHD8DZ, 0FCD8ZZ, 0F7D8ZZ, 0F758DZ, 0F778DZ, 0F798DZ, 0F788DZ, 0F7D8DZ, 0FHB8DZ, 0FPB8DZ, 0FPD8DZ |
| Percutaneous biliary procedures <sup>#</sup>       | 51.01, 51.96, 51.98                                                                                            | 0F943ZZ, 0FC93ZZ, 0F753Dz, 0F753DZ, 0F63ZZ, 0F783DZ, 0F783ZZ, 0F793ZZ, 0F793DZ, 0F993ZZ, 0F994ZZ, 0FC53ZZ, 0FC54ZZ, 0FC64ZZ, 0FC84ZZ, 0FC84ZZ, 0FC83ZZ, 0FC63ZZ.                                                                                                                                                                                                                                                                                                                                                                                           |
| Acute respiratory failure                          | 518.0, 518.81, 518.82, 518.84                                                                                  | J96.0*, J96.2*, J98.1*                                                                                                                                                                                                                                                                                                                                                                                                                                                                                                                                     |
| Acute Renal Failure                                | 584.*                                                                                                          | N17*                                                                                                                                                                                                                                                                                                                                                                                                                                                                                                                                                       |
| Systemic inflammatory response syndrome            | 995.94                                                                                                         | R65.10, R65.11                                                                                                                                                                                                                                                                                                                                                                                                                                                                                                                                             |
| Obesity                                            | 278.00, 278.01, 278.03, V85.3, V85.4, V85.54                                                                   | E66.0, E66.1, E66.2, E66.8, E66.9, Z68.3, Z68.4, Z68.54                                                                                                                                                                                                                                                                                                                                                                                                                                                                                                    |
| Undernutrition                                     | V85.51, V85.0, 260, 261, 262, 263                                                                              | Z68.51, Z68.1, E40, E41, E42, E43, E44, E45, E46                                                                                                                                                                                                                                                                                                                                                                                                                                                                                                           |

<sup>#</sup> Procedure codes.

**Table S2.** Multiple logistic regression model of various factors associated with severe acute pancreatitis.

| Parameters                   | OR (Confidence Interval) | P Value |
|------------------------------|--------------------------|---------|
| Age                          | 1.02 (1.01 to 1.03)      | <0.001  |
| Female vs Male               | 0.68 (0.61 to 0.76)      | <0.001  |
| Insurance                    |                          |         |
| Public                       | Reference                |         |
| Private                      | 0.84 (0.74 to 0.94)      | <0.001  |
| Others/Self Pay              | 0.80 (0.68 to 0.96)      | <0.001  |
| Race                         |                          |         |
| Caucasian                    | Reference                |         |
| African American             | 1.15 (0.96 to 1.37)      | 0.10    |
| Hispanics                    | 0.96 (0.83 to 1.10)      | 0.60    |
| Others                       | 0.94 (0.81 to 1.08)      | 0.39    |
| Location/Teaching status     |                          |         |
| Rural                        | Reference                |         |
| Urban Non-teaching           | 2.08 (1.58 to 2.73)      | <0.001  |
| Urban Teaching               | 2.72 (2.09 to 3.55)      | <0.001  |
| Cholangitis                  | 2.56 (1.64 to 4.02)      | <0.001  |
| Cholelithiasis               | 0.91 (0.79 to 1.05)      | 0.23    |
| Other Biliary Disease        | 0.87 (0.64 to 1.16)      | 0.35    |
| Hypertriglyceridemia         | 1.95 (1.55 to 2.44)      | <0.001  |
| Hypercalcemia                | 5.26 (3.31 to 8.36)      | <0.001  |
| Diabetic Ketoacidosis        | 3.57 (2.85 to 4.48)      | <0.001  |
| Systemic Lupus Erythematosus | 4.98 (3.4 to 7.30)       | <0.001  |
| Cystic fibrosis              | 0.69 (0.34 to 1.42)      | 0.32    |
| Inflammatory Bowel Disease   | 0.28 (0.15 to 0.52)      | <0.001  |
| Malignancy                   | 2.46 (1.56 to 3.76)      | <0.001  |
| Organ transplant             | 2.42 (1.56 to 3.76)      | <0.001  |
| Alcohol related              | 1.03 (0.80 to 1.33)      | 0.79    |
| Nutritional Status           |                          |         |
| Control population           | Reference                |         |
| undernutrition               | 2.55 (2.03 to 3.20)      | <0.001  |
| Obesity                      | 1.62 (1.39 to 1.89)      | <0.001  |

**Table S3.** Multiple linear regression model of various factors associated with length of stay and total hospitalization costs.

| Parameters                   | Length of stay (days)  |         | Total hospitalization costs (USD) |         |
|------------------------------|------------------------|---------|-----------------------------------|---------|
|                              | Days (CI)              | P Value | USD (CI)                          | P value |
| Age                          | -0.04 (-0.06 to -0.03) | <0.001  | -99 (-151 to -47)                 | <0.001  |
| Female vs Male               | 0.02 (-0.01 to 0.15)   | 0.74    | -56 (-522 to 409)                 | 0.81    |
| Insurance                    |                        |         |                                   |         |
| Private                      | Ref                    |         | Ref                               |         |
| Public                       | 0.29 (0.14 to 0.44)    | <0.001  | 1138 (641 to 1635)                | <0.001  |
| Others/Self Pay              | -0.07 (-0.28 to 0.13)  | 0.47    | -77 (-768 to 614)                 | 0.82    |
| Race                         |                        |         |                                   |         |
| Caucasian                    | Ref                    |         | Ref                               |         |
| African American             | 0.10 (-0.14 to 0.35)   | 0.42    | 684 (-153 to 1523)                | 0.10    |
| Hispanics                    | 0.08 (-0.11 to 0.28)   | 0.41    | 1485 (816 to 2154)                | <0.001  |
| Others                       | -0.06 (-0.24 to 0.10)  | 0.44    | 378 (-194 to 951)                 | 0.19    |
| Location/Teaching status     |                        |         |                                   |         |
| Rural                        | Ref                    |         |                                   |         |
| Urban Non-teaching           |                        | 0.043   | 734 (534 to 1043)                 | <0.001  |
| Urban Teaching               | 1.21 (1.03 to 1.45)    | <0.001  | 2976 (1346 to 4412)               | <0.001  |
| Cholangitis                  | 2.18 (1.44 to 2.93)    | <0.001  | 5355 (2766 to 7943)               | <0.001  |
| Cholelithiasis               | 0.68 (0.52 to 0.84)    | <0.001  | 3609 (3041 to 4176)               | <0.001  |
| Other Biliary Disease        | 1.06 (0.71 to 1.41)    | <0.001  | 2545 (1325 to 3765)               | <0.001  |
| Hypertriglyceridemia         | 0.76 (0.37 to 1.15)    | <0.001  | 1643 (297 to 2989)                | <0.001  |
| Hypercalcemia                | 1.65 (0.58 to 2.73)    | 0.03    | 5300 (1614 to 8986)               | <0.001  |
| Diabetic Ketoacidosis        | 1.02 (0.58 to 1.46)    | <0.001  | 3031 (1475 to 4588)               | <0.001  |
| Systemic Lupus Erythematosus | 4.97 (4.12 to 5.83)    | <0.001  | 9886 (6871 to 12901)              | <0.001  |
| Cystic fibrosis              | 0.11 (-0.58 to 0.81)   | 0.74    | 789 (-1628 to 3207)               | <0.001  |
| Inflammatory Bowel Disease   | 0.01 (-0.4 to 0.44)    | 0.94    | 547 (-962 to 2058)                | <0.001  |
| Malignancy                   | 5.14 (4.73 to 5.55)    | <0.001  | 22593 (21162 to 24042)            | <0.001  |
| Organ transplant             | 0.46 (-0.34 to 1.28)   | 0.26    | 3783 (890 to 6675)                | <0.001  |
| Alcohol related              | 0.09 (-0.21 to 0.39)   | <0.001  | 63 (-993 to 1120)                 | <0.001  |
| Nutritional Status           |                        |         |                                   |         |
| Control population           | Reference              |         | Reference                         |         |
| undernutrition               | 6.12 (5.67 to 6.57)    | <0.001  | 15,919 (14317 to 17520)           | <0.001  |
| Obesity                      | 0.53 (0.32 to 0.73)    | <0.001  | 1,952 (1237 to 2667)              | <0.001  |
